# Supplementary material for: Validation of Genome-Wide SSR Markers Developed for Genetic Diversity and Population Structure Study in Grain Amaranth (Amaranthus hypochondriacus)
Source: MDPI journal article supplement (doi:10.3390/agriculture13020431), 2023-02-12

**Supplementary Figure S1.** Gel image representation displaying g-SSR profile of 94 accessions of *A. hypochondriacus* using AhySSR0595 marker. Lane M denotes 100 bp DNA ladder

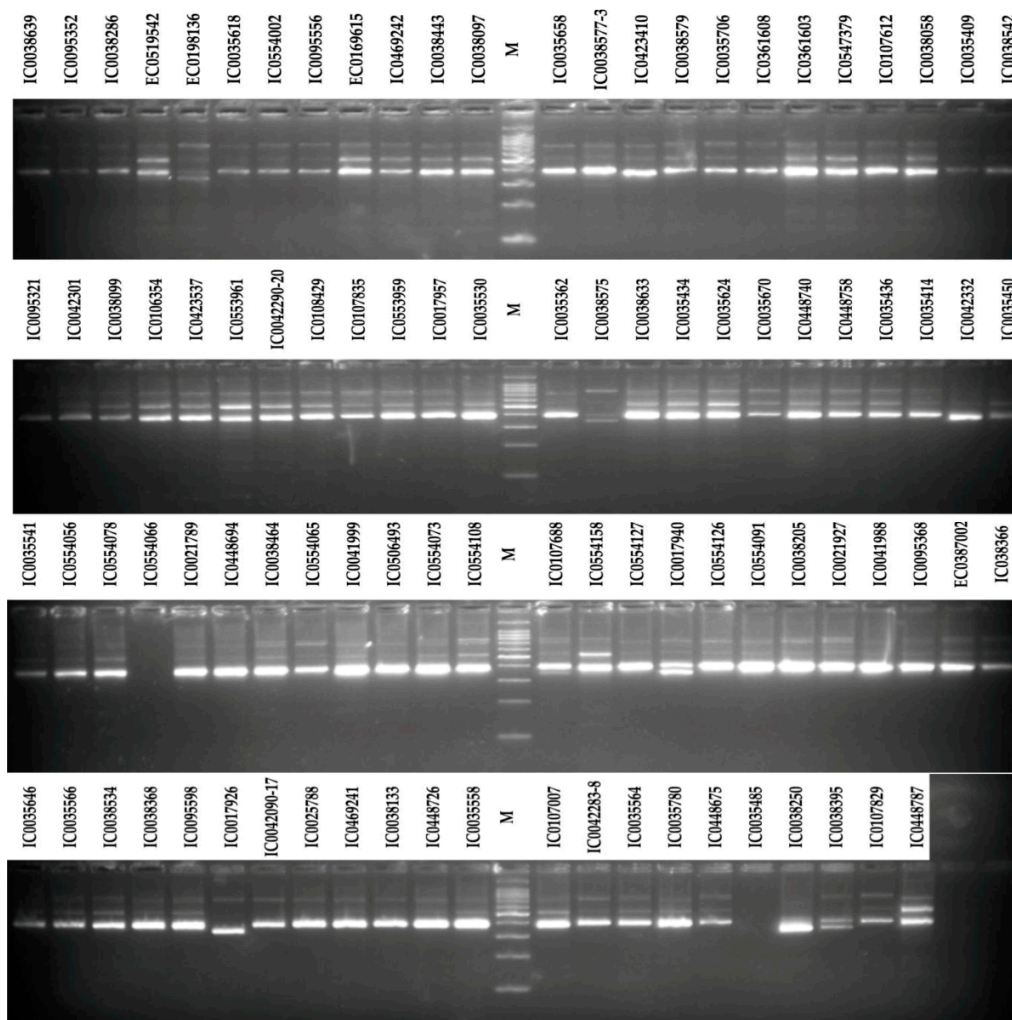

Supplement: s1 [file s1]
