# Supplementary material for: Validation of Genome-Wide SSR Markers Developed for Genetic Diversity and Population Structure Study in Grain Amaranth (Amaranthus hypochondriacus)
Source: MDPI journal article supplement (doi:10.3390/agriculture13020431), 2023-02-12
Supplement: s1 [file s1]

Archive with 5 entries (5 files):
- Figure S1.pdf
- Table S1.xlsx
- Table S2.xlsx
- Table S3.pdf
- Table S4.pdf
