# Supplementary material for: Validation of Genome-Wide SSR Markers Developed for Genetic Diversity and Population Structure Study in Grain Amaranth (Amaranthus hypochondriacus)
Source: MDPI journal article supplement (doi:10.3390/agriculture13020431), 2023-02-12
Supplement: s1 [file s1 › Table S1.xlsx]

## Sheet: Sheet1
Table S1:	List of Grain Amaranth accessions used in the present study
Serial No	Accessions	Location	District
1	EC0519542	Exotic Species	St petersburg, Russia
2	EC0198136	Exotic Species	Iowa, U.S.A
3	EC0387002	Exotic Species	Iowa, U.S.A
4	EC0169615	Exotic Species	PA, U.S.A
5	IC0035780	Gujarat	Ahmedabad
6	IC0035618	Gujarat	Mehsana
7	IC0035658	Gujarat	Mehsana
8	IC0035530	Gujarat	Mehsana
9	IC0035624	Gujarat	Mehsana
10	IC0035541	Gujarat	Mehsana
11	IC0035646	Gujarat	Mehsana
12	IC0035566	Gujarat	Mehsana
13	IC0035558	Gujarat	Mehsana
14	IC0035564	Gujarat	Mehsana
15	IC0025788	Others	East Kameng, Arunachal Pradesh
16	IC0042301	Others	Baghpat, Uttar Pardesh
17	IC0361608	Himachal Pradesh	Chamba
18	IC0361603	Himachal Pradesh	Chamba
19	IC0547379	Himachal Pradesh	Chamba
20	IC0106354	Himachal Pradesh	Hamirpur
21	IC0035706	Himachal Pradesh	Kangra
22	IC0035670	Himachal Pradesh	Kangra
23	IC0095598	Himachal Pradesh	Kangra
24	IC0423410	Himachal Pradesh	Kinnaur
25	IC0038579	Himachal Pradesh	Kinnaur
26	IC0038542	Himachal Pradesh	Kinnaur
27	IC0017957	Himachal Pradesh	Kinnaur
28	IC0038575	Himachal Pradesh	Kinnaur
29	IC0038633	Himachal Pradesh	Kinnaur
30	IC038366	Himachal Pradesh	Kinnaur
31	IC0038534	Himachal Pradesh	Kinnaur
32	IC0038368	Himachal Pradesh	Kinnaur
33	IC0017926	Himachal Pradesh	Kinnaur
34	IC0038286	Himachal Pradesh	Kullu
35	IC0038097	Himachal Pradesh	Kullu
36	IC0107612	Himachal Pradesh	Kullu
37	IC0038099	Himachal Pradesh	Kullu
38	IC0107688	Himachal Pradesh	Kullu
39	IC0095368	Himachal Pradesh	Kullu
40	IC0038133	Himachal Pradesh	Kullu
41	IC0038443	Himachal Pradesh	Mandi
42	IC0107007	Himachal Pradesh	Mandi
43	IC0038395	Himachal Pradesh	Mandi
44	IC0038639	Himachal Pradesh	Shimla
45	IC0469242	Himachal Pradesh	Shimla
46	IC0038058	Himachal Pradesh	Shimla
47	IC0423537	Himachal Pradesh	Shimla
48	IC0038464	Himachal Pradesh	Shimla
49	IC0506493	Himachal Pradesh	Shimla
50	IC0038205	Himachal Pradesh	Shimla
51	IC0469241	Himachal Pradesh	Shimla
52	IC0038250	Himachal Pradesh	Shimla
53	IC0107829	Himachal Pradesh	Shimla
54	IC0095352	Himachal Pradesh	Sirmaur
55	IC0095321	Himachal Pradesh	Sirmaur
56	IC0108429	Himachal Pradesh	Sirmaur
57	IC0107835	Himachal Pradesh	Sirmaur
58	IC0017940	Himachal Pradesh	Sirmaur
59	IC0041999	Madhya Pradesh	Betul
60	IC0041988	Madhya Pradesh	Betul
61	IC0021789	Madhya Pradesh	Umaria
62	IC0035409	Maharashtra	Akola
63	IC0035362	Maharashtra	Akola
64	IC0035450	Maharashtra	Akola
65	IC0035434	Maharashtra	Amravati
66	IC0035436	Maharashtra	Amravati
67	IC0035414	Maharashtra	Amravati
68	IC0035485	Maharashtra	Amravati
69	IC0042332	Uttarakhand	Chamoli
70	IC0042283-8	Uttarakhand	Garhwal
71	IC0042290-20	Uttarakhand	Garhwal
72	IC0554002	Uttarakhand	Tehri Garhwal
73	IC0553961	Uttarakhand	Tehri Garhwal
74	IC0553959	Uttarakhand	Tehri Garhwal
75	IC0448740	Uttarakhand	Tehri Garhwal
76	IC0448758	Uttarakhand	Tehri Garhwal
77	IC0554056	Uttarakhand	Tehri Garhwal
78	IC0554078	Uttarakhand	Tehri Garhwal
79	IC0554066	Uttarakhand	Tehri Garhwal
80	IC0448694	Uttarakhand	Tehri Garhwal
81	IC0554065	Uttarakhand	Tehri Garhwal
82	IC0554073	Uttarakhand	Tehri Garhwal
83	IC0554108	Uttarakhand	Tehri Garhwal
84	IC0554158	Uttarakhand	Tehri Garhwal
85	IC0554127	Uttarakhand	Tehri Garhwal
86	IC0554126	Uttarakhand	Tehri Garhwal
87	IC0021927	Uttarakhand	Tehri Garhwal
88	IC0554091	Uttarakhand	Tehri Garhwal
89	IC0448726	Uttarakhand	Tehri Garhwal
90	IC0448675	Uttarakhand	Tehri Garhwal
91	IC0448787	Uttarakhand	Tehri Garhwal
92	IC0095556	Unknown	Unknown
93	IC0038577-3	Unknown	Unknown
94	IC0042090-17	Unknown	Unknown
