# Supplementary material for: Validation of Genome-Wide SSR Markers Developed for Genetic Diversity and Population Structure Study in Grain Amaranth (Amaranthus hypochondriacus)
Source: MDPI journal article supplement (doi:10.3390/agriculture13020431), 2023-02-12
Supplement: s1 [file s1 › Table S2.xlsx]

## Sheet: Sheet4
Table S2	List of g-SSR markers used along with their Forward and Reverse sequences and annealing temperature.
S.No.	Markers	Forward Primer	Reverse Primer	Annealing Temperature (ºC)	Motif
1	AhySSR1363	GGAAACATGGGAATGAGACG	CTTGGTTCAGCTAGACAAACTTACA	49.2	ATT
2	AhySSR37960	TCAGGATGATGTTGCACTGA	TGGTGATGATGACGACGACT	46.5	AAAATC
3	AhySSR41001	AAAGATGAGGTCCGCCAATA	GAGCCAAAACCCCAATTCTC	42.6	TCACAAC
4	AhySSR12555	TGCCACTAAATCCAATGTTGC	GTGGACCTCGTTTCCACACT	52.2	TTA
5	AhySSR43989	AATTTCGTGGGCTGAACAAC	TAATGGCTGCGGTTATAGGG	51.9	GAA
6	AhySSR48966	AAAGGCATGGGTATCATCGT	AACCCTAACGTTGCCTCCTT	48	AAT
7	AhySSR51527	CTGGGTTACGTTGTGCAAGA	CAAAATGCGCGTACGATAAA	46.9	AAT
8	AhySSR0595	GACAGCGAACTAAGGGCAAA	CAGATTCGACCCAAATCCAT	46.5	TTA
9	AhySSR3176	CAATCGTCACCGTCATCATC	TACCACTACCACCACCACCA	49	ATC
10	AhySSR4597	TGGAAAAGCCATTGATTGTG	GACAATGGGAGGAAGGGTTT	50.7	TA
11	AhySSR5081	AAAAGGGTGTGGGTGTTGAG	ACTGGGCTTGAGAGGCATTT	53.3	AAT
12	AhySSR16096	ACCGGATGACCTGCTAATTG	GGCAGCAGGAGATTGAGATT	49.2	CAC
13	AhySSR18586	CGCACTGGAACTTCTCCCTA	CCTTCTCACCCTTCTCATTTTG	45.2	TGTA
14	AhySSR19060	AGTTGGGTCTCGCAAGAAAA	TGAAGGTGAATGACGGCTACT	45.7	ATA
15	AhySSR23586	GGCCCAAAATAGAAATGTCC	AGTGGGATCTTGTTTGAATCG	47.6	ATA
16	AhySSR28598	CAGGTCATCTGGTGAAGTGGT	GCGGCAACTCATACCCATAA	46.2	TTA
17	AhySSR29093	GCCCCTTGAGAGAGAGGGTA	GCGTAGAATTGGATGCATGT	52.2	TAT
18	AhySSR29571	AAAATGGTTGGGCTTTTGTG	GAACCCCAGCTTTGTAGCAG	47.6	AAT
19	AhySSR31577	TGTGTAGGCACATGAAAACGA	TCACGGTGGAGGAAGAAAAC	55	AAT
20	AhySSR43465	AGTTGAGCTGGGCACCTTAC	TTGGATTCTTTCCTCCAACG	49	TCT
21	AhySSR49996	AGGAAAATGCCCCTCAAAGT	TCAAAAGTGTGTGGGTGCTC	55	TAA
22	AhySSR39451	CAAAACCCAGCTCTTCCCTA	TGGTGGTGTTGTTAGGTTGAAG	45.7	CCA
23	AhySSR33457	CGTACACCTTTTGCCACGAT	CGTTGTCAAGATAGGGGAGGT	40.2	TG
24	AhySSR0261	TCATCCTCATCCTCGTCCTC	GAAGCACTTCGTGGTCCAAT	48	TCC
25	AhySSR39465	AGAAAACGGAGGCAAAAGGT	CGAAAAGAGTTGGGTGAAGC	48.3	TTA
26	AhySSR38506	ATAGCGGCGATTTCATCATC	CGCAATTTGGATACCTTCGT	49	TAT
27	AhySSR0471	TCTCATTGGATCCCTCCCTA	TCACACCCCTATCCTTCCTG	54.9	TA
28	AhySSR51061	CCTGGGCATTTAAAACTAGCA	CGACAACTGCATCACCCTTA	52.2	GA
29	AhySSR44477	GCATTGTTTTCGCGTTTTCT	CATCCATCTAGCCCTGCATC	50.7	ATTG
30	AhySSR0542	TCCAGAAAACCGCAGAAGAT	ACACACACACACACACACACAC	53.3	TATG
31	AhySSR8059	CCGACACTTGTTTCCTTGGT	CAGCTTGTTGCTCGACTCAC	50.7	TTA
32	AhySSR11576	ACCTGCTCAACCCAAAGAAG	AAGGCCTGCTCAATCCTATG	53.3	GT
33	AhySSR12579	CAAGGAGGTGATCCTGGAAA	GGTTGTGGAGGAGAGCAGTC	52.2	AAT
34	AhySSR18091	CTTGCTTTCCTGCTTGCTCT	CGGCAGCAACTCATACACAT	49	TTA
35	AhySSR21572	TCTGTGAACACTTTGAGCGAGT	CCATCTAGGCGAGTTTGAGG	55	AC
36	AhySSR46467	GTGCTTGTTTGAGCGTTTCA	TGGATTGGTTAATGGGTGGT	49	CA
