# Supplementary material for: Validation of Genome-Wide SSR Markers Developed for Genetic Diversity and Population Structure Study in Grain Amaranth (Amaranthus hypochondriacus)
Source: MDPI journal article supplement (doi:10.3390/agriculture13020431), 2023-02-12
Supplement: s1 [file s1 › Table S3.pdf]

**Supplementary Table S3.** Analysis of molecular variance (AMOVA) based on geographic populations using 36 g-SSRs among and within subpopulation of 94 amaranth accessions.

| Source              | df  | SS       | MS     | Est. Var. | %    |
|---------------------|-----|----------|--------|-----------|------|
| <b>Among Pops</b>   | 7   | 214.945  | 30.706 | 1.181     | 11%  |
| <b>Among Indiv</b>  | 86  | 678.209  | 7.886  | 0.000     | 0%   |
| <b>Within Indiv</b> | 94  | 909.500  | 9.676  | 9.676     | 89%  |
| <b>Total</b>        | 187 | 1802.654 |        | 10.857    | 100% |

**df:** degrees of freedom

**SS:** sum of squares

**MS:** mean squares

**Est. Var.:** Estimated Variance
